# Supplementary material
Source: HighWire-hosted journal article supplement (https://bjsm.bmj.com/content/55/13/730)

## Supplementary files

### Supplementary file A: Search Strategy for all databases

#### MEDLINE, AMED, CINAHL, and SPORTDiscus:

(exercis\* OR exertion OR “physical fitness” OR sport\* OR pliability OR “physical endurance” OR “physical therapy” OR rehabilitation OR exertion\* OR resistance OR run\* OR jog\* OR treadmill\* OR swim\* OR bicycl\* OR walk\* OR muscle strength\* OR (physical W3 (fitness OR therapy)) OR (physical\* W2 endur\*) OR ((strength\* OR isometric\* OR isotonic\* OR isokinetic\* OR aerobic\* OR endurance OR weight\*) N3 train\*) OR (cycle\* OR cycling) OR (row OR rows OR rowing) OR (skate\* OR skating)) AND (“Neck Pain” OR “Neck Injuries” OR neckache OR “neck ache” OR cervicodynia OR cervicalgia) OR ((injur\* OR pain\* OR ach\* OR sore OR stiff\* OR discomfort OR “chronic pain”) N3 (neck OR cervical OR cervico\*)) AND (Randomi?ed OR randomly OR RCT OR “placebo controlled”)

#### EMBASE:

(exercis\* OR exertion OR “physical fitness” OR sport\* OR pliability OR “physical endurance” OR “physical therapy” OR rehabilitation OR exertion\* OR resistance OR run\* OR jog\* OR treadmill\* OR swim\* OR bicycl\* OR walk\* OR “muscle strength\*” OR (physical adj3 (fitness OR therapy)) OR (physical\* adj2 endur\*) OR ((strength\* OR isometric\* OR isotonic\* OR isokinetic\* OR aerobic\* OR endurance OR weight\*) adj3 train\*) OR (cycle\* OR cycling) OR (row OR rows OR rowing) OR (skate\* OR skating)) AND (Neck Pain OR Neck Injuries OR neckache OR neck ache OR cervicodynia OR cervicalgia OR ((injur\* OR pain\* OR ach\* OR sore OR stiff\* OR discomfort OR chronic pain) adj3 (neck OR cervical OR cervico\*)) AND (Randomi?ed OR randomly OR RCT OR “placebo controlled”)

**PsycINFO:**

(exercis\* OR exertion OR physical fitness OR sport\* OR pliability OR physical endurance OR physical therapy OR rehabilitation OR exertion\* OR resistance OR run\* OR jog\* OR treadmill\* OR swim\* OR bicycl\* OR walk\* OR muscle strength\* OR (physical near/3 (fitness OR therapy)) OR (physical\* near/2 endur\*) OR ((strength\* OR isometric\* OR isotonic\* OR isokinetic\* OR aerobic\* OR endurance OR weight\*) near/3 train\*) OR (cycle\* OR cycling) OR (row OR rows OR rowing) OR (skate\* OR skating)) AND (Neck Pain OR Neck Injuries OR neckache OR neck ache OR cervicodynia OR cervicalgia OR ((injur\* OR pain\* OR ach\* OR sore OR stiff\* OR discomfort OR chronic pain) near/3 (neck OR cervical OR cervico\*))) AND (Randomi?ed OR randomly OR RCT OR placebo controlled)

**Cochrane Central Register of Controlled Trials:**

(exercis\* OR exertion OR physical fitness OR sport\* OR pliability OR physical endurance OR physical therapy OR rehabilitation OR exertion\* OR resistance OR run\* OR jog\* OR treadmill\* OR swim\* OR bicycl\* OR walk\* OR muscle strength\* OR (physical NEAR/3 (fitness OR therapy)) OR (physical\* NEAR/2 endur\*) OR ((strength\* OR isometric\* OR isotonic\* OR isokinetic\* OR aerobic\* OR endurance OR weight\*) NEAR/3 train\*) OR (cycle\* OR cycling) OR (row OR rows OR rowing) OR (skate\* OR skating)) AND ((Neck Pain OR Neck Injuries OR neckache OR neck ache OR cervicodynia OR cervicalgia) OR ((injur\* OR pain\* OR ach\* OR sore OR stiff\* OR discomfort OR chronic pain) NEAR/3 (neck OR cervical OR cervico\*))) AND (Randomi?ed OR randomly OR RCT OR placebo controlled)

**Scopus:**

(exercis\* OR exertion OR "physical fitness" OR sport\* OR pliability OR "physical endurance" OR "physical therapy" OR rehabilitation OR exertion\* OR resistance OR run\* OR jog\* OR treadmill\* OR swim\* OR bicycl\* OR walk\* OR "muscle strength") OR ((physical W/3 (fitness OR therapy)) OR (physical\* W/2 endur\*) OR ((strength\* OR isometric\* OR isotonic\* OR isokinetic\* OR aerobic\* OR endurance OR weight\*) W/3 train\*) OR (cycle\* OR cycling) OR (row OR rows OR rowing) OR (skate\* OR skating)) AND (("Neck Pain" OR "Neck Injuries" OR neckache OR "neck ache" OR cervicodynia OR cervicalgia) OR ((injur\* OR pain\* OR ach\* OR sore OR stiff\* OR discomfort OR "chronic pain") W/3 (neck OR cervical OR cervico\*))) AND (Randomi?ed OR randomly OR RCT OR "placebo controlled")

**Physiotherapy Evidence Database:***Search 1:*

Abstract & title: exercise neck pain

Therapy: fitness training

Problem: pain

Body part: head or neck

Sub discipline: Musculoskeletal

Topic: chronic pain

Method: clinical trial

*Search 2:*

Abstract & title: exercise neck pain

Therapy: strength training

Problem: pain

Body part: head or neck

Sub discipline: Musculoskeletal

Topic: chronic pain

Method: clinical trial

## Supplementary file B: Summary table of all data included in the network for pain intensity

Treatment types: 1 Strengthening, 2 Multimodal, 3 PPA+Strength, 4 Motor Control, 5 Stretching, 6 Proprioceptive, 7 No treatment, 8 Prescribed PPA, 9 Strength+Stretch, 10 Balance, 11 Yoga/Pilates/Tai Chi/Qigong, 12 Strength+Motor Control, 13 ROM

| painID | study | Author year    | Treatment arm 1 |         |             |    | Treatment arm 2 |         |             |    | Treatment arm 3 |        |          |    | Treatment arm 4 |        |       |    |
|--------|-------|----------------|-----------------|---------|-------------|----|-----------------|---------|-------------|----|-----------------|--------|----------|----|-----------------|--------|-------|----|
|        |       |                | treat           | y       | sd          | n  | treat           | y       | sd          | n  | treat           | y      | sd       | n  | treat           | y4     | sd4   | n4 |
| 1      | 1     | Alpayci 2017   | 1               | -3.91   | 1.672692    | 34 | 7               | -1.56   | 1.478276    | 31 |                 |        |          |    |                 |        |       |    |
| 2      | 2     | Andersen 2013  | 1               | -26     | 22.89509    | 69 | 7               | -12     | 24.37041    | 49 |                 |        |          |    |                 |        |       |    |
| 3      | 3     | Andersen 2014  | 1               | -1.862  | 0.508       | 24 | 7               | 0.015   | 0.554       | 23 |                 |        |          |    |                 |        |       |    |
| 4      | 4     | Andersen 2012  | 1               | -2.291  | 0.309       | 43 | 1               | -3.02   | 0.355       | 40 | 1               | -2.509 | 0.455    | 27 | 7               | -1.164 | 0.364 | 48 |
| 5      | 5     | Andersen 2008  | 1               | -20     | 13.0767     | 18 | 8               | -2      | 18.24829    | 16 | 7               | -1     | 21.07131 | 8  |                 |        |       |    |
| 6      | 7     | Beinert 2013   | 10              | -1.68   | 1.645934    | 17 | 7               | -0.83   | 2.585595    | 17 |                 |        |          |    |                 |        |       |    |
| 7      | 8     | Bobos 2016     | 4               | -3.45   | 2.045558659 | 23 | 1               | -1.65   | 2.082327399 | 22 | 7               | -1     | 1.873932 | 22 |                 |        |       |    |
| 8      | 9     | Caputo 2017    | 1               | 2.86667 | 2.26017     | 18 | 5               | 4.16667 | 2.592593    | 17 |                 |        |          |    |                 |        |       |    |
| 9      | 11    | Chiu 2005      | 12              | -1.6    | 2.12838     | 67 | 7               | -0.5    | 2.206808    | 78 |                 |        |          |    |                 |        |       |    |
| 10     | 12    | Cramer 2013    | 11              | -28.6   | 17.10205    | 25 | 9               | -12.1   | 22.26028    | 26 |                 |        |          |    |                 |        |       |    |
| 11     | 13    | deAurajo 2018  | 11              | -5.1    | 1.665023    | 32 | 7               | -0.28   | 1.905282    | 32 |                 |        |          |    |                 |        |       |    |
| 12     | 14    | Dellve 2011    | 1               | -0.1    | 1.7         | 20 | 7               | 0.5     | 1.6         | 20 |                 |        |          |    |                 |        |       |    |
| 13     | 15    | Dunleavy 2016  | 11              | -0.9    | 1.282012    | 20 | 11              | -0.3    | 1.348591    | 19 | 7               | -0.2   | 0.447338 | 17 |                 |        |       |    |
| 14     | 17    | Evans 2012     | 1               | -3.1    | 1.68226     | 89 | 8               | -1.9    | 1.852026    | 90 |                 |        |          |    |                 |        |       |    |
| 15     | 18    | Falla 2008     | 4               | -0.9    | 2.4         | 28 | 1               | -1.1    | 2.8         | 29 |                 |        |          |    |                 |        |       |    |
| 16     | 21    | Falla 2013     | 12              | -1.7    | 2.2         | 22 | 7               | -0.3    | 2.1         | 23 |                 |        |          |    |                 |        |       |    |
| 17     | 22    | Izquierdo 2016 | 4               | 3.49667 | 0.955412    | 14 | 6               | 3.52667 | 1.274332    | 14 |                 |        |          |    |                 |        |       |    |
| 18     | 23    | Ghaderi 2017   | 4               | -39.62  | 24.24067    | 20 | 7               | -39     | 19.57217    | 20 |                 |        |          |    |                 |        |       |    |
| 19     | 26    | Hakkinen 2008  | 5               | -32     | 25.14352    | 52 | 1               | -37     | 24.37041    | 49 |                 |        |          |    |                 |        |       |    |
| 20     | 27    | Hoving 2012    | 2               | -2.8    | 2.3         | 59 | 7               | -2.6    | 2.4         | 64 |                 |        |          |    |                 |        |       |    |

|    |    |                                |    |        |             |     |   |         |          |     |    |       |             |    |
|----|----|--------------------------------|----|--------|-------------|-----|---|---------|----------|-----|----|-------|-------------|----|
| 21 | 30 | Javanshir 2015                 | 4  | -2.7   | 1.63        | 30  | 1 | -2.32   | 1.19     | 30  |    |       |             |    |
| 22 | 31 | Jordan 2011                    | 11 | -31    | 17.47311    | 42  | 8 | -30.1   | 22.94796 | 39  | 7  | -12.4 | 23.64007    | 41 |
| 23 | 32 | Jull 2009                      | 4  | -1.7   | 2           | 23  | 1 | -1      | 3.3      | 23  |    |       |             |    |
| 24 | 33 | Jull 2002                      | 12 | -3.26  | 2.740219    | 52  | 7 | -1.43   | 2.078461 | 48  |    |       |             |    |
| 25 | 34 | Karlsson 2014<br>Khosrokiani   | 9  | -2.5   | 4.50575     | 34  | 5 | 1.33333 | 2.566001 | 23  |    |       |             |    |
| 26 | 36 | 2018                           | 4  | -2.4   | 1.848351    | 15  | 7 | 0.73    | 2.604304 | 15  |    |       |             |    |
| 27 | 38 | Kjellman 2002                  | 8  | -29    | 24.63737    | 23  | 7 | -26     | 21.65641 | 26  |    |       |             |    |
| 28 | 40 | Lange 2013                     | 12 | -1     | 0.34641     | 27  | 7 | 0.2     | 0.4      | 28  |    |       |             |    |
| 29 | 42 | Lansinger 2007                 | 11 | -13.75 | 17.58954    | 60  | 1 | -23.25  | 17.86016 | 62  |    |       |             |    |
| 30 | 43 | Lauche 2016                    | 11 | -21.8  | 22.11357    | 38  | 8 | -21     | 18.76619 | 37  | 7  | -9.7  | 21.83369    | 39 |
| 31 | 44 | Li 2017                        | 1  | -2.86  | 1.130796    | 38  | 1 | -2.41   | 0.972163 | 35  | 7  | -0.34 | 1.104898    | 36 |
| 32 | 46 | Michalsen 2012                 | 11 | -31.3  | 17.47598    | 38  | 8 | -7.5    | 21.51116 | 39  |    |       |             |    |
| 33 | 50 | OLeary 2012                    | 1  | -9     | 16.53028    | 20  | 4 | -19.2   | 11.85074 | 20  | 13 | -10.1 | 11.63228    | 20 |
| 34 | 51 | Ravi 2016                      | 1  | -2.8   | 0.750395    | 25  | 6 | -3.08   | 0.676683 | 25  |    |       |             |    |
| 35 | 52 | Rendant 2011<br>Tunwattanapong | 8  | -6.82  | 1.45        | 34  | 7 | -1.56   | 1.478276 | 31  |    |       |             |    |
| 36 | 59 | 2016                           | 5  | -2.2   | 1.587451    | 48  | 7 | -0.6    | 1.56205  | 48  |    |       |             |    |
| 37 | 60 | Viljanen 2003                  | 1  | -1.9   | 2.463737    | 135 | 7 | -1.4    | 2.364318 | 130 |    |       |             |    |
| 38 | 69 | Ylinen 2003                    | 1  | -39    | 21.07130751 | 60  | 1 | -34     | 22       | 59  | 7  | -15   | 21.65640783 | 60 |

## Supplementary file C: Summary table of all data included in the network for disability

| disabID | study | Author year            | Treatment arm 1 |          |          |    | Treatment arm 2 |          |          |    | Treatment arm 3 |       |          |    |
|---------|-------|------------------------|-----------------|----------|----------|----|-----------------|----------|----------|----|-----------------|-------|----------|----|
|         |       |                        | treat           | y        | sd       | n  | treat           | y        | sd       | n  | treat           | y     | sd       | n  |
| 1       | 8     | Bobos 2016             | 4               | -11.4    | 6.956469 | 23 | 1               | -4.2     | 5.184963 | 22 | 7               | -2.4  | 3.880434 | 22 |
| 2       | 9     | Caputo 2017            | 1               | -7.83333 | 7.379577 | 18 | 5               | -9       | 9.281455 | 17 |                 |       |          |    |
| 3       | 11    | Chiu 2005              | 12              | -0.4     | 0.556776 | 67 | 7               | -0.3     | 0.556776 | 78 |                 |       |          |    |
| 4       | 12    | Cramer 2013            | 11              | -7.8     | 9.901515 | 25 | 9               | -3.8     | 13.22876 | 26 |                 |       |          |    |
| 5       | 13    | deAurajo 2018          | 11              | -9.72    | 6.066927 | 32 | 7               | -2.19    | 6.442911 | 32 |                 |       |          |    |
| 6       | 15    | Dunleavy 2016          | 11              | -4.3     | 5.662219 | 20 | 11              | -4.7     | 5.498101 | 19 | 7               | -0.3  | 0.447338 | 17 |
| 7       | 17    | Evans 2012             | 1               | -10.1    | 10.62968 | 89 | 8               | -9       | 9.76166  | 90 |                 |       |          |    |
| 8       | 18    | Falla 2008             | 4               | -3.7     | 4.7      | 28 | 1               | -2.8     | 4        | 29 |                 |       |          |    |
| 9       | 21    | Falla 2013             | 12              | -4.1     | 4.8      | 22 | 7               | -1       | 4.4      | 23 |                 |       |          |    |
| 10      | 22    | Gallego Izquierdo 2016 | 4               | -3.25    | 2.488614 | 14 | 6               | -3.28    | 2.753525 | 14 |                 |       |          |    |
| 11      | 23    | Ghaderi 2017           | 4               | -16      | 10.97133 | 20 | 7               | -15.72   | 13.43093 | 20 |                 |       |          |    |
| 12      | 24    | Griffiths 2009         | 7               | -6.98    | 20.24654 | 37 | 4               | -6.83    | 21.39445 | 37 |                 |       |          |    |
| 13      | 26    | Hakkinen 2008          | 5               | -8       | 10.77579 | 52 | 1               | -8       | 10.44446 | 49 |                 |       |          |    |
| 14      | 27    | Hoving 2012            | 2               | -6       | 7        | 59 | 7               | -5.9     | 7.2      | 64 |                 |       |          |    |
| 15      | 30    | Javanshir 2015         | 4               | -18.07   | 10.2     | 30 | 1               | -14.2    | 11.2     | 30 |                 |       |          |    |
| 16      | 31    | Jordan 2011            | 11              | -14      | 11.73065 | 42 | 8               | -8       | 15.11241 | 39 | 7               | -5.1  | 15.01558 | 41 |
| 17      | 32    | Jull 2009              | 4               | -5       | 4.2      | 23 | 1               | -3.5     | 2.3      | 23 |                 |       |          |    |
| 18      | 33    | Jull 2002              | 12              | -11.03   | 15.57598 | 52 | 7               | -3.72    | 9.976613 | 48 |                 |       |          |    |
| 19      | 34    | Karlsson 2014          | 9               | -5       | 5.925926 | 34 | 5               | -5.83333 | 5.185185 | 23 |                 |       |          |    |
| 20      | 36    | Khosrokiani 2018       | 4               | -17.86   | 11.89003 | 15 | 7               | 0.26     | 11.6042  | 15 |                 |       |          |    |
| 21      | 38    | Kjellman 2002          | 8               | -12      | 16       | 23 | 7               | -9       | 14.52584 | 26 |                 |       |          |    |
| 22      | 42    | Lansinger 2007         | 11              | 0        | 13.18038 | 60 | 1               | -4.5     | 10.19103 | 62 |                 |       |          |    |
| 23      | 43    | Lauche 2016            | 11              | -9.3     | 10.73499 | 38 | 8               | -7.4     | 9.559812 | 37 | 7               | -1.8  | 10.1843  | 39 |
| 24      | 44    | Li 2017                | 1               | -12.53   | 5.708756 | 38 | 1               | -12.06   | 6.087988 | 35 | 7               | -0.34 | 6.435985 | 36 |
| 25      | 46    | Michalsen 2012         | 11              | -7       | 4.71593  | 38 | 8               | 24.5     | 6        | 39 |                 |       |          |    |

|    |    |                     |   |        |          |    |   |       |          |    |    |      |         |    |
|----|----|---------------------|---|--------|----------|----|---|-------|----------|----|----|------|---------|----|
| 26 | 50 | O'Leary 2012        | 1 | -4.9   | 3.724245 | 20 | 4 | -4.4  | 2.666458 | 20 | 13 | -2.9 | 2.98161 | 20 |
| 27 | 51 | Ravi 2016           | 1 | -8.424 | 7.564225 | 25 | 6 | -3.64 | 7.022052 | 25 |    |      |         |    |
| 28 | 59 | Tunwattanapong 2016 | 5 | -7     | 11.54686 | 48 | 7 | -2.3  | 13.01576 | 48 |    |      |         |    |
| 29 | 69 | Ylinen 2003         | 1 | -24    | 13       | 60 | 1 | -22   | 14.5284  | 59 | 7  | -12  | 15      | 60 |

## Supplementary file D: Details of GRADE assessment for all pairwise comparisons within the pain intensity network

| Comparison                      | k | Prop | direct SMD [95% CI]       | Quality of | Indirect SMD [95% CI]     | Quality of | NMA SMD [95% CI]          | Quality   | p-     |
|---------------------------------|---|------|---------------------------|------------|---------------------------|------------|---------------------------|-----------|--------|
|                                 |   |      |                           | evidence   |                           | evidence   |                           | of        |        |
| Balance vs No treatment         | 1 | 1    | -0.3829 [-2.1548;1.3889]  | Very low‡* |                           |            | -0.3829 [-2.1548;1.3889]  | Very low‡ |        |
| Multimodal vs No treatment      | 1 | 1    | -0.0845 [-1.7588;1.5899]  | Very low‡  |                           |            | -0.0845 [-1.7588;1.5899]  | Very low‡ |        |
| Motor control vs No treatment   | 3 | 0.47 | -0.845 [-1.8703;0.1803]   | Very low‡* | -1.9015 [-2.8725;-0.9305] | Moderate   | -1.402 [-2.1070;-0.6970]  | Moderate  | 0.1426 |
| Prescribed PA vs No treatment   | 5 | 0.7  | -0.9854 [-1.7704;-0.2004] | Low†       | -0.5854 [-1.7850;0.6142]  | Very low‡  | -0.8655 [-1.5223;-0.2086] | Low†      | 0.5845 |
| Strength vs No treatment        | 9 | 0.7  | -1.3998 [-1.9805;-0.8190] | Low*       | -1.1585 [-2.0380;-0.2790] | Low†       | -1.3265 [-1.8111;-0.8419] | Moderate  | 0.6537 |
| Strength+Motor vs No treatment  | 4 | 1    | -1.1944 [-2.0585;-0.3304] | Moderate   |                           |            | -1.1944 [-2.0585;-0.3304] | Moderate  |        |
| Stretch vs No treatment         | 1 | 0.33 | -1.0079 [-2.6989;0.6831]  | Very low‡  | -1.2142 [-2.3937;-0.0347] | Low†       | -1.1467 [-2.1141;-0.1792] | Low†      | 0.8445 |
| YPTCQ vs No treatment           | 5 | 0.68 | -1.018 [-1.7924;-0.2436]  | Low†       | -1.761 [-2.8900;-0.6321]  | Moderate   | -1.2557 [-1.8943;-0.6171] | Moderate  | 0.2874 |
| Motor control vs Strength       | 5 | 0.69 | -0.4064 [-1.1820;0.3693]  | Very low‡  | 0.6706 [-0.4942;1.8353]   | Very low‡  | -0.0755 [-0.7211;0.5701]  | Very low‡ | 0.1315 |
| Prescribed PA vs Strength       | 2 | 0.35 | 0.8472 [-0.3714;2.0657]   | Very low‡  | 0.2536 [-0.6397;1.1468]   | Very low‡  | 0.4611 [-0.2594;1.1815]   | Very low‡ | 0.4413 |
| Proprioceptive vs Strength      | 1 | 0.55 | -0.3857 [-2.1154;1.3439]  | Very low‡* | -0.0809 [-1.9976;1.8358]  | Very low‡  | -0.2489 [-1.5330;1.0352]  | Very low‡ | 0.817  |
| ROM vs Strength                 | 1 | 0.78 | -0.0797 [-1.8298;1.6704]  | Very low‡  | 1.4512 [-1.8917;4.7941]   | Very low‡  | 0.2496 [-1.3008;1.8001]   | Very low‡ | 0.4265 |
| Motor control vs Proprioceptive | 1 | 0.52 | 0.0259 [-1.7705;1.8223]   | Very low‡  | 0.3307 [-1.5236;2.1850]   | Very low‡  | 0.1734 [-1.1168;1.4637]   | Very low‡ | 0.817  |
| Motor control vs ROM            | 1 | 0.78 | -0.6593 [-2.4159;1.0972]  | Very low‡  | 0.8604 [-2.4479;4.1687]   | Very low‡  | -0.3251 [-1.8765;1.2263]  | Very low‡ | 0.4265 |
| Strength vs Stretch             | 2 | 0.59 | 0.1431 [-1.0765;1.3628]   | Very low‡  | -0.6528 [-2.1286;0.8230]  | Very low‡  | -0.1799 [-1.1200;0.7603]  | Very low‡ | 0.4152 |
| Strength+Stretch vs Stretch     | 1 | 0.6  | -0.299 [-2.0198;1.4219]   | Very low‡* | 0.9456 [-1.1569;3.0481]   | Very low‡  | 0.2003 [-1.1314;1.5320]   | Very low‡ | 0.3693 |
| Prescribed PA vs YPTCQ          | 3 | 0.58 | 0.4231 [-0.5582;1.4044]   | Very low‡  | 0.3446 [-0.8132;1.5025]   | Very low‡  | 0.3903 [-0.3583;1.1389]   | Very low‡ | 0.9193 |



|                                  |   |      |                          |           |                           |           |                           |           |        |
|----------------------------------|---|------|--------------------------|-----------|---------------------------|-----------|---------------------------|-----------|--------|
| Strength vs YPTCQ                | 2 | 0.33 | -0.0993 [-1.3104;1.1118] | Very low‡ | -0.0564 [-0.9154;0.8026]  | Very low‡ | -0.0708 [-0.7714;0.6299]  | Very low‡ | 0.9549 |
| Strength+Stretch vs YPTCQ        | 1 | 0.59 | 0.8163 [-0.9177;2.5503]  | Very low‡ | -0.4282 [-2.5199;1.6635]  | Very low‡ | 0.3094 [-1.0255;1.6444]   | Very low‡ | 0.3693 |
| Proprioceptive vs No treatment   | 0 | 0    |                          |           | -1.5754 [-2.9206;-0.2303] | Low†      | -1.5754 [-2.9206;-0.2303] | Low†      |        |
| ROM vs No treatment              | 0 | 0    |                          |           | -1.0769 [-2.6775;0.5237]  | Very low‡ | -1.0769 [-2.6775;0.5237]  | Very low‡ |        |
| Strength+Stretch vs No treatment | 0 | 0    |                          |           | -0.9463 [-2.3175;0.4248]  | Very low‡ | -0.9463 [-2.3175;0.4248]  | Very low‡ |        |
| Balance vs Multimodal            | 0 | 0    |                          |           | -0.2984 [-2.7363;2.1394]  | Very low‡ | -0.2984 [-2.7363;2.1394]  | Very low‡ |        |
| Balance vs Motor control         | 0 | 0    |                          |           | 1.0191 [-0.8879;2.9260]   | Very low‡ | 1.0191 [-0.8879;2.9260]   | Very low‡ |        |
| Multimodal vs Motor control      | 0 | 0    |                          |           | 1.3175 [-0.4992;3.1342]   | Very low‡ | 1.3175 [-0.4992;3.1342]   | Very low‡ |        |
| Balance vs Prescribed PA         | 0 | 0    |                          |           | 0.4825 [-1.4072;2.3722]   | Very low‡ | 0.4825 [-1.4072;2.3722]   | Very low‡ |        |
| Multimodal vs Prescribed PA      | 0 | 0    |                          |           | 0.781 [-1.0176;2.5796]    | Very low‡ | 0.781 [-1.0176;2.5796]    | Very low‡ |        |
| Motor control vs Prescribed PA   | 0 | 0    |                          |           | -0.5365 [-1.4474;0.3743]  | Very low‡ | -0.5365 [-1.4474;0.3743]  | Very low‡ |        |
| Balance vs Proprioceptive        | 0 | 0    |                          |           | 1.1925 [-1.0321;3.4171]   | Very low‡ | 1.1925 [-1.0321;3.4171]   | Very low‡ |        |
| Multimodal vs Proprioceptive     | 0 | 0    |                          |           | 1.491 [-0.6568;3.6387]    | Very low‡ | 1.491 [-0.6568;3.6387]    | Very low‡ |        |
| Prescribed PA vs Proprioceptive  | 0 | 0    |                          |           | 0.71 [-0.7450;2.1649]     | Very low‡ | 0.71 [-0.7450;2.1649]     | Very low‡ |        |
| Balance vs ROM                   | 0 | 0    |                          |           | 0.694 [-1.6938;3.0817]    | Very low‡ | 0.694 [-1.6938;3.0817]    | Very low‡ |        |
| Multimodal vs ROM                | 0 | 0    |                          |           | 0.9924 [-1.3239;3.3088]   | Very low‡ | 0.9924 [-1.3239;3.3088]   | Very low‡ |        |
| Prescribed PA vs ROM             | 0 | 0    |                          |           | 0.2114 [-1.4827;1.9056]   | Very low‡ | 0.2114 [-1.4827;1.9056]   | Very low‡ |        |
| Proprioceptive vs ROM            | 0 | 0    |                          |           | -0.4985 [-2.4616;1.4646]  | Very low‡ | -0.4985 [-2.4616;1.4646]  | Very low‡ |        |
| Balance vs Strength              | 0 | 0    |                          |           | 0.9436 [-0.8934;2.7805]   | Very low‡ | 0.9436 [-0.8934;2.7805]   | Very low‡ |        |
| Multimodal vs Strength           | 0 | 0    |                          |           | 1.242 [-0.5010;2.9851]    | Very low‡ | 1.242 [-0.5010;2.9851]    | Very low‡ |        |
| Balance vs Strength+Motor        | 0 | 0    |                          |           | 0.8115 [-1.1598;2.7828]   | Very low‡ | 0.8115 [-1.1598;2.7828]   | Very low‡ |        |
| Multimodal vs Strength+Motor     | 0 | 0    |                          |           | 1.1099 [-0.7742;2.9941]   | Very low‡ | 1.1099 [-0.7742;2.9941]   | Very low‡ |        |

|                                   |   |   |                          |           |                          |           |
|-----------------------------------|---|---|--------------------------|-----------|--------------------------|-----------|
| Motor control vs Strength+Motor   | 0 | 0 | -0.2076 [-1.3227;0.9076] | Very low‡ | -0.2076 [-1.3227;0.9076] | Very low‡ |
| Prescribed PA vs Strength+Motor   | 0 | 0 | 0.329 [-0.7564;1.4143]   | Very low‡ | 0.329 [-0.7564;1.4143]   | Very low‡ |
| Proprioceptive vs                 |   |   |                          |           |                          |           |
| Strength+Motor                    | 0 | 0 | -0.381 [-1.9798;1.2177]  | Very low‡ | -0.381 [-1.9798;1.2177]  | Very low‡ |
| ROM vs Strength+Motor             | 0 | 0 | 0.1175 [-1.7014;1.9365]  | Very low‡ | 0.1175 [-1.7014;1.9365]  | Very low‡ |
| Strength vs Strength+Motor        | 0 | 0 | -0.1321 [-1.1228;0.8586] | Very low‡ | -0.1321 [-1.1228;0.8586] | Very low‡ |
| Balance vs Strength+Stretch       | 0 | 0 | 0.5634 [-1.6770;2.8039]  | Very low‡ | 0.5634 [-1.6770;2.8039]  | Very low‡ |
| Multimodal vs Strength+Stretch    | 0 | 0 | 0.8619 [-1.3023;3.0260]  | Very low‡ | 0.8619 [-1.3023;3.0260]  | Very low‡ |
| Motor control vs                  |   |   |                          |           |                          |           |
| Strength+Stretch                  | 0 | 0 | -0.4557 [-1.9489;1.0375] | Very low‡ | -0.4557 [-1.9489;1.0375] | Very low‡ |
| Prescribed PA vs Strength+Stretch | 0 | 0 | 0.0809 [-1.3722;1.5340]  | Very low‡ | 0.0809 [-1.3722;1.5340]  | Very low‡ |
| Proprioceptive vs                 |   |   |                          |           |                          |           |
| Strength+Stretch                  | 0 | 0 | -0.6291 [-2.5011;1.2429] | Very low‡ | -0.6291 [-2.5011;1.2429] | Very low‡ |
| ROM vs Strength+Stretch           | 0 | 0 | -0.1306 [-2.1941;1.9330] | Very low‡ | -0.1306 [-2.1941;1.9330] | Very low‡ |
| Strength vs Strength+Stretch      | 0 | 0 | -0.3802 [-1.7568;0.9965] | Very low‡ | -0.3802 [-1.7568;0.9965] | Very low‡ |
| Strength+Motor vs                 |   |   |                          |           |                          |           |
| Strength+Stretch                  | 0 | 0 | -0.2481 [-1.8688;1.3726] | Very low‡ | -0.2481 [-1.8688;1.3726] | Very low‡ |
| Balance vs Stretch                | 0 | 0 | 0.7637 [-1.2550;2.7825]  | Very low‡ | 0.7637 [-1.2550;2.7825]  | Very low‡ |
| Multimodal vs Stretch             | 0 | 0 | 1.0622 [-0.8716;2.9959]  | Very low‡ | 1.0622 [-0.8716;2.9959]  | Very low‡ |
| Motor control vs Stretch          | 0 | 0 | -0.2554 [-1.3691;0.8584] | Very low‡ | -0.2554 [-1.3691;0.8584] | Very low‡ |
| Prescribed PA vs Stretch          | 0 | 0 | 0.2812 [-0.8345;1.3969]  | Very low‡ | 0.2812 [-0.8345;1.3969]  | Very low‡ |
| Proprioceptive vs Stretch         | 0 | 0 | -0.4288 [-2.0111;1.1536] | Very low‡ | -0.4288 [-2.0111;1.1536] | Very low‡ |

|                           |   |   |                          |           |                          |           |
|---------------------------|---|---|--------------------------|-----------|--------------------------|-----------|
| ROM vs Stretch            | 0 | 0 | 0.0698 [-1.7352;1.8747]  | Very low‡ | 0.0698 [-1.7352;1.8747]  | Very low‡ |
| Strength+Motor vs Stretch | 0 | 0 | -0.0478 [-1.3448;1.2493] | Very low‡ | -0.0478 [-1.3448;1.2493] | Very low‡ |
| Balance vs YPTCQ          | 0 | 0 | 0.8728 [-1.0106;2.7562]  | Very low‡ | 0.8728 [-1.0106;2.7562]  | Very low‡ |
| Multimodal vs YPTCQ       | 0 | 0 | 1.1713 [-0.6207;2.9633]  | Very low‡ | 1.1713 [-0.6207;2.9633]  | Very low‡ |
| Motor control vs YPTCQ    | 0 | 0 | -0.1463 [-1.0424;0.7499] | Very low‡ | -0.1463 [-1.0424;0.7499] | Very low‡ |
| Proprioceptive vs YPTCQ   | 0 | 0 | -0.3197 [-1.7652;1.1258] | Very low‡ | -0.3197 [-1.7652;1.1258] | Very low‡ |
| ROM vs YPTCQ              | 0 | 0 | 0.1788 [-1.5072;1.8649]  | Very low‡ | 0.1788 [-1.5072;1.8649]  | Very low‡ |
| Strength+Motor vs YPTCQ   | 0 | 0 | 0.0613 [-1.0131;1.1357]  | Very low‡ | 0.0613 [-1.0131;1.1357]  | Very low‡ |
| Stretch vs YPTCQ          | 0 | 0 | 0.1091 [-0.9600;1.1782]  | Very low‡ | 0.1091 [-0.9600;1.1782]  | Very low‡ |

k = Number of studies providing direct evidence, prop = proportion of direct evidence, NMA (SMD) = estimated treatment effect (SMD) in network meta-analysis, direct (SMD) = estimated treatment effect (SMD) derived from direct evidence, indirect (SMD) = estimated treatment effect (SMD) derived from indirect evidence, p = p-value of test for disagreement (difference between direct and indirect evidence)

Reasons for downgrading: †Imprecision (1 downgrade), ‡Severe imprecision (2 downgrades), \*risk of bias (1 downgrade)

The p-value indicated that the findings between direct and indirect comparisons was not statistically significant and therefore no comparisons have been downgraded based on inconsistency

### Supplementary file E: Details of GRADE assessment for all pairwise comparisons within the pain-related disability network

| Comparison                      | k | prop | Direct SMD [95% CI]        | Quality of evidence | Indirect SMD [95% CI]      | Quality of evidence | NMA SMD [95% CI]           | Quality of evidence | p-value |
|---------------------------------|---|------|----------------------------|---------------------|----------------------------|---------------------|----------------------------|---------------------|---------|
| Multimodal vs No treatment      | 1 | 1    | -0.014 [-1.3719; 1.3440]   | Very low‡           |                            |                     | -0.014 [-1.3719; 1.3440]   | Very low‡           |         |
| Motor Control vs No treatment   | 4 | 0.63 | -0.7316 [-1.4629; -0.0004] | Very low‡*          | -1.095 [-2.0454; -0.1447]  | Very low‡           | -0.8668 [-1.4463; -0.2873] | Low†                | 0.5525  |
| Motor Control vs Proprioceptive | 1 | 0.51 | 0.0111 [-1.4948; 1.5170]   | Very low‡           | -0.8175 [-2.3492; 0.7143]  | Very low‡           | -0.3961 [-1.4700; 0.6777]  | Very low‡           | 0.4496  |
| Motor Control vs ROM            | 1 | 0.79 | -0.4659 [-1.9201; 0.9882]  | Very low‡           | -1.103 [-3.8939; 1.6879]   | Very low‡           | -0.602 [-1.8916; 0.6877]   | Very low‡           | 0.6915  |
| Motor Control vs Strength       | 5 | 0.69 | -0.4188 [-1.0595; 0.2219]  | Very low‡           | 0.5482 [-0.4051; 1.5015]   | Very low‡           | -0.1179 [-0.6497; 0.4139]  | Very low‡           | 0.0989  |
| Prescribed PA vs No treatment   | 3 | 0.66 | -0.3163 [-1.1241; 0.4914]  | Very low‡           | 0.9814 [-0.1436; 2.1063]   | Very low‡           | 0.1251 [-0.5310; 0.7813]   | Very low‡           | 0.0663  |
| Prescribed PA vs Strength       | 1 | 0.3  | 0.1074 [-1.2361; 1.4508]   | Very low‡           | 1.1999 [0.3240; 2.0758]    | Very low‡           | 0.874 [0.1403; 1.6077]     | Very low‡           | 0.1818  |
| Prescribed PA vs YPTCQ          | 3 | 0.68 | 1.702 [0.8569; 2.5471]     | Moderate            | 0.3958 [-0.8290; 1.6207]   | Very low‡           | 1.2807 [0.5851; 1.9764]    | Moderate            | 0.0854  |
| Proprioceptive vs Strength      | 1 | 0.56 | 0.6452 [-0.7843; 2.0747]   | Very low‡*          | -0.1834 [-1.7866; 1.4199]  | Very low‡           | 0.2782 [-0.7888; 1.3452]   | Very low‡           | 0.4496  |
| ROM vs Strength                 | 1 | 0.78 | 0.6212 [-0.8360; 2.0785]   | Very low‡           | -0.0131 [-2.7871; 2.7609]  | Very low‡           | 0.484 [-0.8060; 1.7741]    | Very low‡           | 0.6915  |
| Strength vs No treatment        | 3 | 0.43 | -1.0156 [-1.8203; -0.2110] | Very low‡           | -0.546 [-1.2476; 0.1556]   | Very low‡           | -0.7489 [-1.2777; -0.2201] | Very low‡           | 0.3886  |
| Strength vs Stretch             | 2 | 0.61 | 0.0633 [-0.9379; 1.0646]   | Very low‡           | -0.2153 [-1.4723; 1.0418]  | Very low‡           | -0.0448 [-0.8280; 0.7384]  | Very low‡           | 0.734   |
| Strength vs YPTCQ               | 1 | 0.25 | -0.3804 [-1.7395; 0.9787]  | Very low‡           | 0.6721 [-0.1170; 1.4612]   | Very low‡           | 0.4067 [-0.2757; 1.0892]   | Very low‡           | 0.1893  |
| Strength+Motor vs No treatment  | 3 | 1    | -0.4542 [-1.2547; 0.3463]  | Very low‡           |                            |                     | -0.4542 [-1.2547; 0.3463]  | Very low‡           |         |
| Strength+Stretch vs Stretch     | 1 | 0.61 | 0.1457 [-1.2684; 1.5598]   | Very low‡*          | -0.1833 [-1.9355; 1.5690]  | Very low‡           | 0.016 [-1.0845; 1.1164]    | Very low‡           | 0.7746  |
| Strength+Stretch vs YPTCQ       | 1 | 0.6  | 0.3361 [-1.0869; 1.7591]   | Very low‡           | 0.6651 [-1.0800; 2.4101]   | Very low‡           | 0.4675 [-0.6353; 1.5703]   | Very low‡           | 0.7746  |
| Stretch vs No treatment         | 1 | 0.36 | -0.379 [-1.7508; 0.9929]   | Very low‡           | -0.8839 [-1.9041; 0.1363]  | Very low‡           | -0.7041 [-1.5227; 0.1146]  | Very low‡           | 0.5627  |
| YPTCQ vs No treatment           | 4 | 0.7  | -0.8575 [-1.5609; -0.1542] | Very low‡           | -1.8585 [-2.9386; -0.7784] | Moderate            | -1.1556 [-1.7450; -0.5662] | Moderate            | 0.128   |
| Multimodal vs Motor Control     | 0 | 0    |                            |                     | 0.8528 [-0.6236; 2.3292]   | Very low‡           | 0.8528 [-0.6236; 2.3292]   |                     |         |
| Multimodal vs Prescribed PA     | 0 | 0    |                            |                     | -0.1391 [-1.6473; 1.3690]  | Very low‡           | -0.1391 [-1.6473; 1.3690]  |                     |         |
| Multimodal vs Proprioceptive    | 0 | 0    |                            |                     | 0.4567 [-1.3195; 2.2328]   | Very low‡           | 0.4567 [-1.3195; 2.2328]   |                     |         |
| Multimodal vs ROM               | 0 | 0    |                            |                     | 0.2508 [-1.6660; 2.1677]   | Very low‡           | 0.2508 [-1.6660; 2.1677]   |                     |         |
| Multimodal vs Strength          | 0 | 0    |                            |                     | 0.7349 [-0.7224; 2.1922]   | Very low‡           | 0.7349 [-0.7224; 2.1922]   |                     |         |

|                                    |   |   |                            |           |                            |
|------------------------------------|---|---|----------------------------|-----------|----------------------------|
| Multimodal vs Strength+Motor       | 0 | 0 | 0.4402 [-1.1362; 2.0165]   | Very low‡ | 0.4402 [-1.1362; 2.0165]   |
| Multimodal vs Strength+Stretch     | 0 | 0 | 0.6741 [-1.1014; 2.4496]   | Very low‡ | 0.6741 [-1.1014; 2.4496]   |
| Multimodal vs Stretch              | 0 | 0 | 0.6901 [-0.8955; 2.2757]   | Very low‡ | 0.6901 [-0.8955; 2.2757]   |
| Multimodal vs YPTCQ                | 0 | 0 | 1.1416 [-0.3387; 2.6220]   | Very low‡ | 1.1416 [-0.3387; 2.6220]   |
| Motor Control vs Prescribed PA     | 0 | 0 | -0.9919 [-1.8069; -0.1769] | Very low‡ | -0.9919 [-1.8069; -0.1769] |
| Motor Control vs Strength+Motor    | 0 | 0 | -0.4126 [-1.4009; 0.5757]  | Very low‡ | -0.4126 [-1.4009; 0.5757]  |
| Motor Control vs Strength+Stretch  | 0 | 0 | -0.1787 [-1.4017; 1.0444]  | Very low‡ | -0.1787 [-1.4017; 1.0444]  |
| Motor Control vs Stretch           | 0 | 0 | -0.1627 [-1.0604; 0.7350]  | Very low‡ | -0.1627 [-1.0604; 0.7350]  |
| Motor Control vs YPTCQ             | 0 | 0 | 0.2888 [-0.4775; 1.0552]   | Very low‡ | 0.2888 [-0.4775; 1.0552]   |
| Prescribed PA vs Proprioceptive    | 0 | 0 | 0.5958 [-0.6701; 1.8616]   | Very low‡ | 0.5958 [-0.6701; 1.8616]   |
| Prescribed PA vs ROM               | 0 | 0 | 0.39 [-1.0674; 1.8473]     | Very low‡ | 0.39 [-1.0674; 1.8473]     |
| Prescribed PA vs Strength+Motor    | 0 | 0 | 0.5793 [-0.4557; 1.6144]   | Very low‡ | 0.5793 [-0.4557; 1.6144]   |
| Prescribed PA vs Strength+Stretch  | 0 | 0 | 0.8133 [-0.4211; 2.0476]   | Very low‡ | 0.8133 [-0.4211; 2.0476]   |
| Prescribed PA vs Stretch           | 0 | 0 | 0.8292 [-0.1522; 1.8106]   | Very low‡ | 0.8292 [-0.1522; 1.8106]   |
| Proprioceptive vs No treatment     | 0 | 0 | -0.4706 [-1.6155; 0.6742]  | Very low‡ | -0.4706 [-1.6155; 0.6742]  |
| Proprioceptive vs ROM              | 0 | 0 | -0.2058 [-1.8393; 1.4276]  | Very low‡ | -0.2058 [-1.8393; 1.4276]  |
| Proprioceptive vs Strength+Motor   | 0 | 0 | -0.0165 [-1.4134; 1.3805]  | Very low‡ | -0.0165 [-1.4134; 1.3805]  |
| Proprioceptive vs Strength+Stretch | 0 | 0 | 0.2175 [-1.3374; 1.7723]   | Very low‡ | 0.2175 [-1.3374; 1.7723]   |
| Proprioceptive vs Stretch          | 0 | 0 | 0.2334 [-1.0739; 1.5407]   | Very low‡ | 0.2334 [-1.0739; 1.5407]   |
| Proprioceptive vs YPTCQ            | 0 | 0 | 0.685 [-0.5511; 1.9210]    | Very low‡ | 0.685 [-0.5511; 1.9210]    |
| ROM vs No treatment                | 0 | 0 | -0.2648 [-1.6177; 1.0880]  | Very low‡ | -0.2648 [-1.6177; 1.0880]  |
| ROM vs Strength+Motor              | 0 | 0 | 0.1893 [-1.3826; 1.7613]   | Very low‡ | 0.1893 [-1.3826; 1.7613]   |
| ROM vs Strength+Stretch            | 0 | 0 | 0.4233 [-1.2913; 2.1379]   | Very low‡ | 0.4233 [-1.2913; 2.1379]   |
| ROM vs Stretch                     | 0 | 0 | 0.4392 [-1.0549; 1.9333]   | Very low‡ | 0.4392 [-1.0549; 1.9333]   |
| ROM vs YPTCQ                       | 0 | 0 | 0.8908 [-0.5407; 2.3222]   | Very low‡ | 0.8908 [-0.5407; 2.3222]   |
| Strength vs Strength+Motor         | 0 | 0 | -0.2947 [-1.2541; 0.6647]  | Very low‡ | -0.2947 [-1.2541; 0.6647]  |
| Strength vs Strength+Stretch       | 0 | 0 | -0.0608 [-1.2178; 1.0962]  | Very low‡ | -0.0608 [-1.2178; 1.0962]  |

|                                  |   |   |                           |           |                           |
|----------------------------------|---|---|---------------------------|-----------|---------------------------|
| Strength+Motor vs                |   |   |                           |           |                           |
| Strength+Stretch                 | 0 | 0 | 0.2339 [-1.1622; 1.6301]  | Very low‡ | 0.2339 [-1.1622; 1.6301]  |
| Strength+Motor vs Stretch        | 0 | 0 | 0.2499 [-0.8951; 1.3949]  | Very low‡ | 0.2499 [-0.8951; 1.3949]  |
| Strength+Motor vs YPTCQ          | 0 | 0 | 0.7014 [-0.2927; 1.6955]  | Very low‡ | 0.7014 [-0.2927; 1.6955]  |
| Strength+Stretch vs No treatment | 0 | 0 | -0.6881 [-1.8320; 0.4557] | Very low‡ | -0.6881 [-1.8320; 0.4557] |
| Stretch vs YPTCQ                 | 0 | 0 | 0.4515 [-0.4594; 1.3625]  | Very low‡ | 0.4515 [-0.4594; 1.3625]  |

k = Number of studies providing direct evidence, prop = proportion of direct evidence, NMA (SMD) = estimated treatment effect (SMD) in network meta-analysis, direct (SMD) = estimated treatment effect (SMD) derived from direct evidence, indirect (SMD) = estimated treatment effect (SMD) derived from indirect evidence, p = p-value of test for disagreement (difference between direct and indirect evidence)

Reasons for downgrading: †Imprecision (1 downgrade), ‡Severe imprecision (2 downgrades), \*risk of bias (1 downgrade)

The p-value indicated that the findings between direct and indirect comparisons was not statistically significant and therefore no comparisons have been downgraded based on inconsistency

## Supplementary file F: Funnel plot for the pain intensity network.

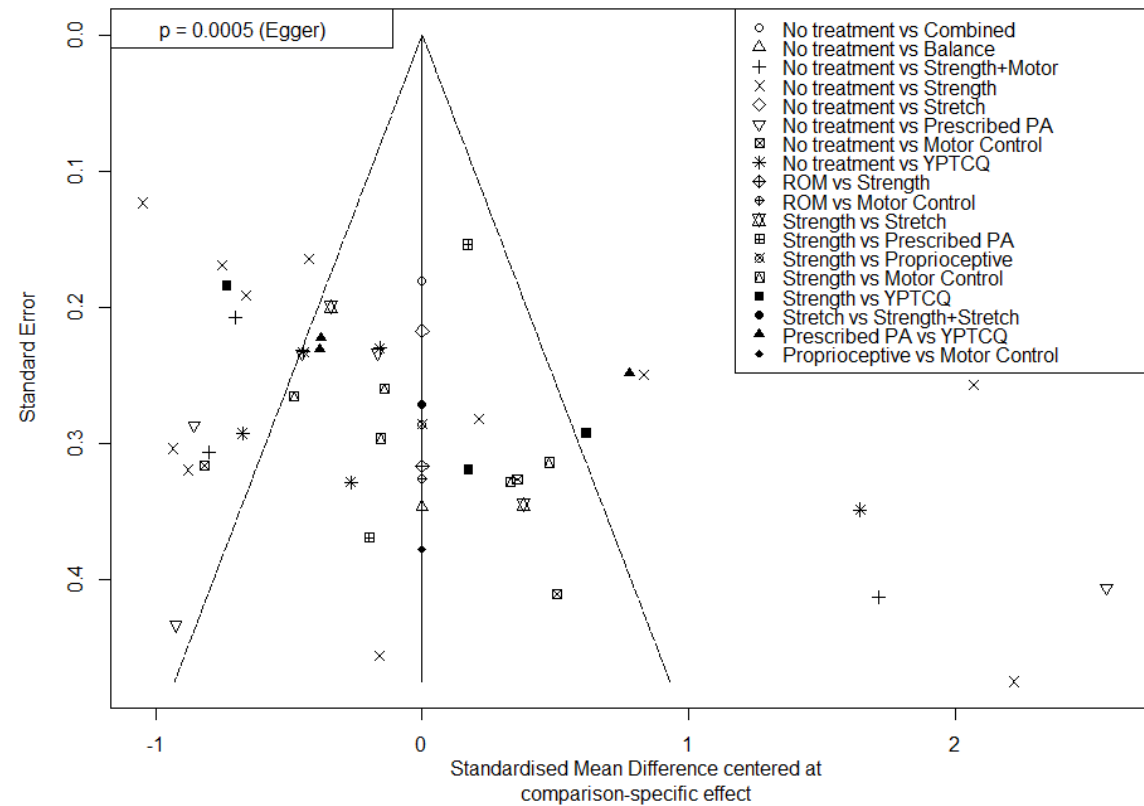

## Supplementary file G: Funnel plot for the pain-related disability network.

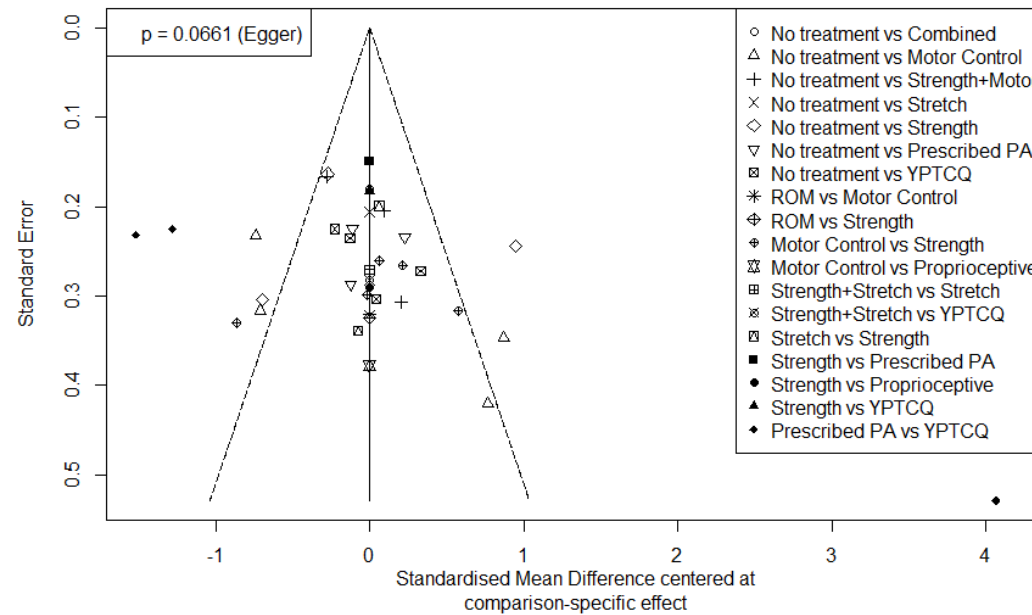



## Supplementary file H. Forest plot of direct and indirect evidence for the pain NMA.

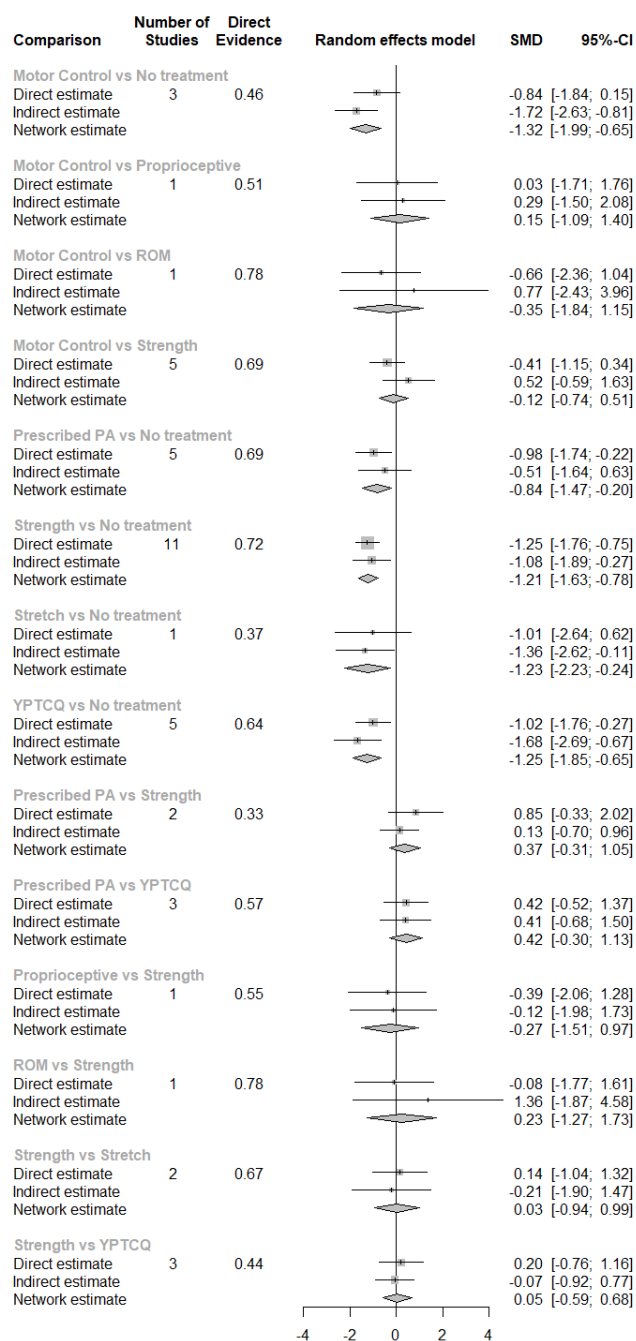

## Supplementary file I. Forest plot of direct and indirect evidence for the disability NMA.

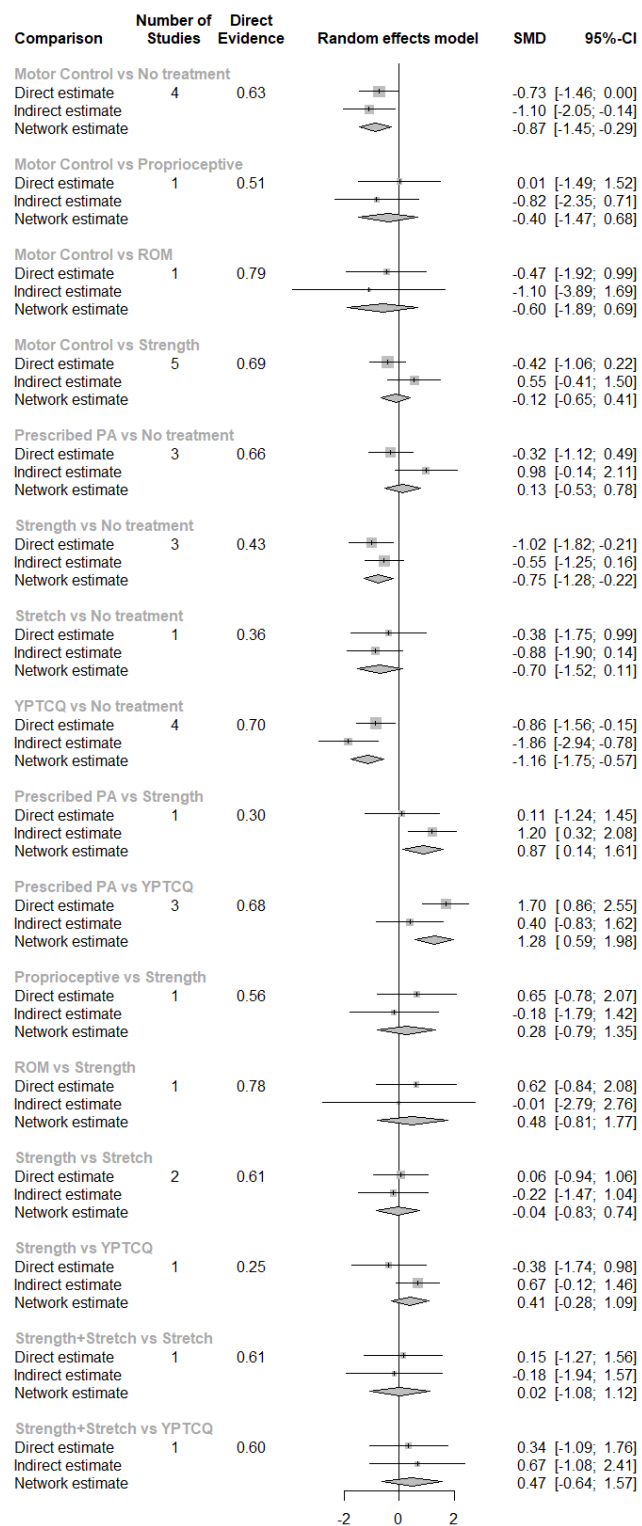

Supplement: inline-supplementary-material-1 [file inline-supplementary-material-1.pdf]
